# Supplementary material
Source: Springer Nature journal article supplement (https://www.springermedizin.de/resource/supplementary/12873_2013_214_MOESM1_ESM.pdf/9431666)

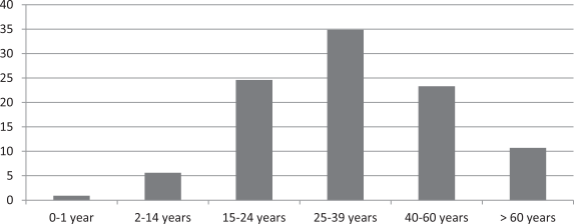

Supplement: MOESM1 [file 9431666]
